# Supplementary material for: Significant Factors in Cranial Remolding Orthotic Treatment of Asymmetrical Brachycephaly
Source: PubMed Central journal article supplement (PMC7231243; doi:10.3390/jcm9041027), 2020-04-05
Supplement: jcm-09-01027-s001.pdf [file jcm-09-01027-s001.pdf]

| <b>Descriptive Statistics</b>                          |              |                |                |             |                       |                 |
|--------------------------------------------------------|--------------|----------------|----------------|-------------|-----------------------|-----------------|
|                                                        | <b>Range</b> | <b>Minimum</b> | <b>Maximum</b> | <b>Mean</b> | <b>Std. Deviation</b> | <b>Variance</b> |
| <b>Corrected Age at Start (months)</b>                 | 15.00        | 2.00           | 17.00          | 5.95        | 1.97                  | 3.89            |
| <b>Corrected Age at End (months)</b>                   | 17.00        | 5.00           | 22.00          | 10.32       | 2.85                  | 8.11            |
| <b>Cranial Vault Asymmetry Index (CVAI) Start</b>      | 11.20        | 3.50           | 14.70          | 6.85        | 2.08                  | 4.33            |
| <b>Cranial Vault Asymmetry Index (CVAI) End</b>        | 10.60        | 0.10           | 10.70          | 2.90        | 1.40                  | 1.95            |
| <b>Cephalic Index (CI) Start (%)</b>                   | 19.80        | 90.00          | 109.80         | 94.67       | 3.29                  | 10.80           |
| <b>Cephalic Index (CI) End (%)</b>                     | 21.50        | 81.30          | 102.80         | 90.54       | 2.39                  | 5.70            |
| <b>Treatment Time (months)</b>                         | 10.00        | 1.00           | 11.00          | 4.30        | 1.67                  | 2.78            |
| <b>Cranial Vault Asymmetry Index (CVAI) Difference</b> | 13.40        | 0.20           | 13.60          | 3.94        | 1.79                  | 3.20            |
| <b>Cephalic Index (CI) Difference (%)</b>              | 12.90        | 0.20           | 13.10          | 4.13        | 2.08                  | 4.33            |
